# Supplementary material for: Serum Homocysteine Level Is a Predictor of Relapse and Prognosis in Patients With First-Attack Neuromyelitis Optica Spectrum Disorders
Source: Front Neurol. 2021 May 26;12:667651. doi: 10.3389/fneur.2021.667651 (PMC8187771; doi:10.3389/fneur.2021.667651)
Supplement: Supplementary file 1 [file Table_1.XLSX]

## Sheet: Sheet1
Demographic characteristics			Medical history			Anti-AQP4 status			Disease characteristics							Therapy regimens			Biomarkers
Name	Age of onset	Gender	Hypertension	Diabetes	Autoimmune diseases	AQP4(+)	AQP4(-)	Not tested	Initial EDSS	Final EDSS	Outcomes	Change of EDSS	Relapse	Fellow-up time	Time	Corticosteroid	Immunosuppressant	Rehabilitation training	Hcy group	HCY	Folic acid	VIT-B12
安书莲	60	1	0	0	0	0	0	1	6	0	0	6	0	25.4137	25	1	1	0	1	6.82	24	691.1
白媛	29	1	0	0	0	1	0	0	3	1.5	0	1.5	1	14.4329	8.8	1	1	0	2	20.48	10.31	289.2
卜庆凤	45	1	0	0	0	1	0	0	2	0	0	2	1	55.8904	17	1	0	0	1	9.88	6.5	837
蔡开云	75	1	1	0	1	1	0	0	8.5	0.5	0	8	0	17.2274	17	1	0	0	1	5.09	9.24	1862.1
曹青	43	1	0	0	0	1	0	0	5	4.5	1	0.5	1	67.7589	4.8	1	0	0	2	22.51	3.6	2000
常洒洒	20	1	0	0	0	1	0	0	3	2.5	0	0.5	1	63.2877	7.8	1	0	0	2	15.31	3.8	566
常五妮	71	1	0	0	1	0	1	0	4.5	1	0	3.5	1	44.5151	6.4	1	0	0	2	12.44	13.9	2000
陈国	51	2	1	0	0	1	0	0	8.5	8	1	0.5	1	83.1452	9.2	1	0	0	2	17.49	6.7	452
陈俊花	46	1	0	0	0	0	1	0	2	0	0	2	0	39.8137	40	0	0	1	1	8.58	4.71	1987.7
陈利美	57	1	1	1	0	1	0	0	5.5	4.5	0	1	0	48.426	48	1	1	0	2	14.51	22.93	489.5
陈西山	79	2	0	0	0	1	0	0	4.5	1	0	3.5	0	45.9616	46	1	1	0	2	13.47	4.2	1678.9
陈献智	52	2	0	0	0	1	0	0	5.5	3.5	0	2	1	54.2795	6.9	1	0	0	2	28.59	3.8	174
陈玉梅	59	1	0	0	0	1	0	0	2	1	0	1	1	64.2082	14.5	0	1	0	2	15.3	15.6	823
陈长明	70	2	1	0	0	1	0	0	6	4	1	2	0	20.5342	21	1	0	0	2	10.87	9.68	1394
陈志伟	41	2	1	0	0	0	1	0	7	6	1	1	1	41.2932	7.2	1	0	0	2	33.26	3.96	255.3
程荣梅	61	1	0	0	1	0	0	1	3	0	0	3	1	76.8329	21.4	1	0	0	2	10.83	4.7	2000
程书磊	31	2	0	0	0	1	0	0	5	4	1	1	0	18.6274	19	1	1	0	2	13.93	16.52	160.7
程素兰	73	1	1	1	0	1	0	0	8	6.5	1	1.5	1	26.4	13.5	1	0	0	2	13.69	10.2	1549
程玉花	54	1	0	1	0	1	0	0	3	2	0	1	0	42.0027	42	1	1	0	2	14.52	9.48	288.1
崔秀红	47	1	0	0	0	1	0	0	4	1	0	3	0	16.6082	17	1	1	0	2	13.85	10.69	526.3
党军卫	45	2	0	0	0	1	0	0	6	3	0	3	1	28.6027	8.6	1	0	0	2	21.16	2.64	791.2
邓玉芝	51	1	0	0	0	0	0	1	2	0	0	2	1	55.9233	16.5	1	1	0	2	10.3	5.5	2000
董翠荣	59	1	0	0	0	1	0	0	6	4	1	2	0	67.5288	66	0	0	1	2	13.1	4.9	418
董文停	48	2	0	0	0	1	0	0	3	1.5	0	1.5	0	49.5178	50	1	0	0	2	19.81	4.8	1280
董秀平	51	1	0	0	0	0	0	1	4	1	0	3	0	50.0575	50	0	0	0	2	10.32	3.4	2000
范玉鸽	36	1	0	0	0	0	1	0	5.5	0	0	5.5	0	19.1014	19	1	0	0	1	7.77	16.18	253.4
方志华	66	2	1	0	0	0	1	0	6.5	6	1	0.5	1	46.9479	17.8	1	1	0	2	19.09	6.69	392
冯超	30	2	1	0	0	0	1	0	6	3.5	1	2.5	1	48.5589	6.4	1	0	0	2	40.52	2.64	1087
冯海霞	54	1	0	0	0	1	0	0	6	2	0	4	0	24.7425	25	1	0	0	2	11.95	12	483
冯威	30	1	0	0	0	1	0	0	5.5	0	0	5.5	1	27.9452	10.2	1	0	0	1	5.07	26.31	320.6
伏志英	30	1	0	0	0	1	0	0	6	4.5	1	1.5	1	31.6932	7.5	1	1	0	2	21.99	3.95	2201.2
付景竹	40	1	0	0	0	1	0	0	5	1	0	4	0	54.6137	55	1	0	0	1	9.43	5	103
付凛威	20	2	0	0	0	0	1	0	5.5	3.5	0	2	1	49.4137	8.3	1	0	0	2	17.75	4.3	215
高付用	70	1	0	1	0	0	0	1	7	4.5	1	2.5	0	39.8986	40	1	0	0	2	11.06	14.6	2000
高敏	32	1	0	0	0	0	1	0	5	0	0	5	1	44.0548	2	1	0	0	1	7.91	7.1	2000
高卫连	51	1	0	0	1	1	0	0	6	4	1	2	0	13.6959	14	1	0	0	2	11.14	7.06	761
高针妞	63	1	1	0	0	1	0	0	6	4	1	2	1	37.6767	13.8	1	1	0	2	13.21	9.94	1091.7
杲艳保	35	2	1	0	0	0	0	1	5	4	1	1	1	29.326	7.6	1	0	0	2	19.01	12.5	2105
耿爱花	43	1	0	0	0	0	0	1	5	1	0	4	0	83.9205	84	1	0	0	1	9.53	9.3	502
耿伟平	53	1	0	0	0	0	0	1	6.5	2.5	0	4	0	51.4849	51	1	0	0	2	10.95	7.9	2000
巩军领	53	2	0	0	1	1	0	0	5	0	0	5	0	27.9452	28	1	0	0	1	8.54	31.68	461
关德学	55	2	0	0	0	1	0	0	6	4.5	1	1.5	1	38.7945	8.4	1	0	0	2	22.28	4.62	2000
郭家营	34	2	1	0	0	0	1	0	6	2	0	4	0	14.7808	15	1	0	0	2	11.22	7.41	417
郭菊香	43	1	0	0	0	1	0	0	6	2	0	4	0	18.9233	19	1	0	0	1	9.35	13.69	439
郭统一	16	2	0	0	0	1	0	0	3	2.5	0	0.5	1	85.9397	4.5	1	0	0	2	18.9	3.4	2000
韩桂香	44	1	0	0	0	1	0	0	5	1	0	4	1	42.2795	4.5	1	0	0	2	10.41	8.77	834
韩红杰	47	2	0	1	0	0	1	0	6	1.5	0	4.5	1	37.4137	5.7	1	1	0	2	10.42	18.57	2000
韩欣	60	1	1	0	0	0	1	0	4	4	1	0	1	24.9534	7.6	0	0	1	2	23.69	19.4	538
韩亚菲	28	1	0	0	0	1	0	0	5	4	1	1	0	26.3205	26	1	0	0	2	15.28	12.9	845
何美荣	47	1	0	0	0	0	1	0	6	0	0	6	1	60.9534	16.9	1	0	0	1	7.29	10.9	2000
和会娟	43	1	0	0	1	1	0	0	7	3.5	1	3.5	0	59.2438	59	1	0	0	2	10.5	9.3	2000
贺继霞	50	1	0	0	0	1	0	0	6	4.5	1	1.5	1	23.2438	2.4	1	0	0	2	19.55	8.93	1935
侯俊秀	64	1	0	0	0	1	0	0	8	6	1	2	1	20.4164	2.4	1	0	0	2	14.84	3.49	2000
荆桂平	48	1	0	1	0	0	1	0	7	5	1	2	1	55.0356	3.4	1	1	0	2	11.69	11.3	392
井连军	46	2	0	0	0	1	0	0	5	1	0	4	1	46.0932	20	1	0	0	1	9.16	13.79	1573.6
李爱娥	51	1	0	0	0	1	0	0	7	4.5	1	2.5	1	53.589	10.6	1	1	0	2	11.1	6.6	525
李颜竹	63	1	0	0	0	0	1	0	4.5	3	0	1.5	1	70.2575	24.4	0	0	1	2	22.4	4.5	218
李艳勤	52	1	0	0	0	1	0	0	8.5	6	1	2.5	1	51.6164	2.7	1	0	0	2	13.03	3.7	2000
李玉峰	65	2	1	0	0	0	0	1	7	3.5	1	3.5	0	25.1178	25	1	1	0	1	6.96	3.88	2000
李玉宣	29	1	0	0	0	0	1	0	2	0	0	2	1	31.0027	28.8	1	0	0	2	15.56	6.9	733.6
梁志银	28	1	0	0	0	0	1	0	3.5	1	0	2.5	0	41.7589	42	1	0	0	2	10.72	9.44	503.2
廖荣彦	32	1	0	0	0	1	0	0	8.5	6	1	2.5	1	33.2055	15.6	1	0	0	2	12.71	19.7	502.3
刘爱兰	83	1	0	0	0	0	0	1	7	4.5	1	2.5	0	39.7342	40	1	0	0	2	11.33	35.19	3574
刘传伟	53	2	0	0	0	0	0	1	5	1	0	4	1	46.4219	11.8	1	0	0	2	11.43	24	1209.3
刘春花	47	1	0	1	0	1	0	0	4.5	1	0	3.5	0	14.2027	14	1	1	0	1	9.81	22.09	1990
刘春林	50	2	0	0	0	0	1	0	4	3.5	0	0.5	1	29.8849	11.2	1	0	0	2	16.26	12.45	446
刘德怀	49	2	0	0	0	0	1	0	8	6	1	2	0	40.4137	40	1	0	0	2	13.3	2.44	1736
刘桂荣	55	1	0	0	0	1	0	0	6	4	1	2	1	19.0356	11.9	1	1	0	2	14.53	21.86	574.6
刘国敏	50	1	0	0	0	0	1	0	5.5	1	0	4.5	1	43.2	11.5	1	0	0	1	9.84	5.92	2000
刘海连	57	1	1	0	1	1	0	0	6.5	3	0	3.5	1	30.8055	26.1	1	0	0	2	17.12	34.47	2445.8
刘红梅	31	1	0	0	0	0	1	0	3	0	0	3	0	20.3507	20	1	0	0	1	8.96	9.74	539.6
刘红霞	44	1	0	0	0	1	0	0	9	3.5	1	5.5	0	14.926	15	1	1	0	1	3.97	10.94	1140.1
刘建美	65	1	1	0	0	0	1	0	4	0	0	4	0	49.6301	50	1	0	0	1	9.51	6.9	1982
刘祥俊	44	1	0	0	1	0	0	1	7	3.5	1	3.5	1	79.3973	26.8	1	0	0	1	9.7	4.8	132
刘新兰	65	1	1	1	0	0	0	1	6.5	2.5	0	4	1	77.9836	30.9	1	0	0	2	10.55	7.8	2000
刘秀玲	49	1	0	0	0	0	0	1	3	0	0	3	1	86.4658	2.1	1	1	0	2	11.2	5	2000
刘艳菊	43	1	0	0	0	1	0	0	3.5	0	0	3.5	1	81.0082	12.1	1	1	0	1	6.03	7.9	2000
吕笑笑	25	2	0	0	0	1	0	0	5	3.5	0	1.5	1	60.0658	21.7	1	1	0	2	42.18	1.7	2000
马爱焕	39	1	0	0	0	1	0	0	4	1	0	3	1	42.1808	9.5	1	0	0	2	11.17	10.1	2000
马许平	41	1	0	0	0	0	0	1	5	1	0	4	1	73.874	12	1	0	0	2	10.46	5.9	561
彭卫平	42	1	0	0	0	1	0	0	6	3.5	1	2.5	0	43.2658	43	1	1	0	1	7.84	15.44	603.8
秦亚平	24	1	0	0	0	1	0	0	4	1	0	3	0	51.7151	52	1	1	0	2	12.48	3.9	401
冉淑霞	48	1	0	0	0	0	1	0	5	4	1	1	0	40.1342	40	1	1	0	2	11.09	6.71	2000
任桂英	63	1	0	0	0	1	0	0	8	5	1	3	1	66.5425	11.1	1	0	0	2	11.5	14.9	1640
宋升辉	33	2	1	1	0	0	1	0	3	2	0	1	0	21.7507	22	1	1	0	2	12.05	15.97	778.7
孙文谊	15	1	0	0	0	0	1	0	6	3	0	3	1	27.6493	4.2	1	1	0	2	14.23	8.02	306.4
田景连	57	1	1	0	0	0	0	1	3	1	0	2	1	67.8575	12.6	1	1	0	2	15.14	8.9	438
王保勤	49	1	0	0	1	0	1	0	2	0	0	2	0	43.0027	43	1	1	0	1	8.44	10.12	385.9
王春霞	35	1	0	0	0	1	0	0	7	6.5	1	0.5	0	61.874	62	1	0	0	2	18.7	3.7	341
王翠兰	46	1	0	0	0	0	0	1	3	0	0	3	1	79.5288	47.2	1	0	0	2	10.4	6.3	318
王粉亮	69	1	0	0	0	1	0	0	2.5	0	0	2.5	1	15.6164	10.4	1	0	0	2	17.34	7.1	508.9
王风梅	69	1	1	0	0	0	1	0	4	0	0	4	1	79.2	35	1	0	0	1	8.7	6	2000
王改玲	34	1	0	0	0	1	0	0	5	2	0	3	1	71.737	13.7	1	1	0	2	10.89	5.5	1902
王桂英	71	1	0	0	1	1	0	0	2.5	0	0	2.5	0	18.2466	18	1	1	0	1	7.76	13.87	336.3
王海晨	57	2	0	0	0	0	1	0	3	1	0	2	0	48.5589	48	1	0	0	2	15.39	6.7	2000
王红莉	40	1	0	0	0	1	0	0	3	0	0	3	0	42.3836	42	1	1	0	2	10.53	6.87	505.3
王会娜	29	1	0	0	1	0	1	0	4	1	0	3	0	44.6658	45	1	1	0	2	12.06	4.97	880.9
王金娥	39	1	0	0	0	1	0	0	1	0	0	1	1	19.4959	1.9	1	1	0	2	14.24	7.45	704.8
王金兰	46	1	0	0	1	1	0	0	4	0	0	4	0	16.274	16	1	0	0	1	7.68	25.6	523.1
王魁	45	2	0	0	0	0	1	0	3	1	0	2	0	40.4959	40	1	1	0	2	13.19	5.6	467
王连宁	16	2	0	0	0	0	1	0	3	2	0	1	0	35.5589	36	1	1	0	2	15.85	3.56	346.7
王铭鑫	18	1	0	0	0	0	0	1	2	1	0	1	0	30.1808	30	1	0	0	2	14.06	4.64	450
王宁宁	21	1	0	0	1	1	0	0	3	0	0	3	0	42.1014	42	1	0	0	2	10.35	5.88	2000
王小密	47	1	0	0	0	1	0	0	3	1	0	2	1	46.9808	8.3	1	0	0	2	12.26	2.1	262
王秀莲	81	1	1	0	0	1	0	0	6	4	1	2	0	22.6904	23	1	0	0	2	10.78	20.72	1937.7
王秀梅	51	1	0	0	0	0	1	0	7	3.5	1	3.5	1	56.2521	12.7	1	1	0	1	8.23	10.2	599
王秀英	45	1	0	0	0	0	0	1	9	4.5	1	4.5	0	25.4466	25	1	0	0	1	9.98	8.98	2000
王雪平	26	1	0	0	0	0	0	1	8.5	8	1	0.5	1	23.8685	7.4	1	0	0	2	26.54	4.69	1121.3
王勇	50	1	0	0	0	1	0	0	6	4.5	1	1.5	0	42.2	42	1	1	0	2	12.05	5.55	2000
王长伟	31	2	0	0	0	0	1	0	6	5.5	1	0.5	1	21.337	6.7	1	0	0	2	32.47	8.1	411.3
吴玉萍	50	1	0	0	0	0	1	0	6	0	0	6	0	51.7342	52	1	0	0	1	7.49	7.3	833
吴玉萍	50	1	0	0	0	0	1	0	6.5	3.5	1	3	0	51.7342	52	1	0	0	1	7.49	7.3	833
武艳花	43	1	0	0	1	0	0	1	5	0	0	5	0	64.7534	65	0	0	1	1	7.83	4.5	2000
夏玉莲	63	1	0	0	0	1	0	0	2.5	0	0	2.5	0	34.789	35	1	0	0	2	10.57	13.45	326.9
向明芳	54	1	0	0	0	1	0	0	8	2.5	0	5.5	0	31.0959	31	1	0	0	1	8.76	18.51	2000
信翠勤	49	1	0	0	1	1	0	0	7	0.5	0	6.5	0	71.6247	72	1	1	0	1	4.6	6.2	872
邢纪兰	52	1	0	0	1	0	0	1	3	0	0	3	0	58.5068	59	1	1	0	2	10.31	7.6	935
徐凤莲	51	1	0	0	1	0	1	0	3	1	0	2	0	23.474	23	1	0	0	2	13.36	7.14	581.1
徐继常	37	2	0	0	0	0	1	0	4	1	0	3	0	47.737	48	1	0	0	2	12.65	3.8	2000
徐兴琴	44	1	1	0	0	0	1	0	1	1	0	0	0	35.4082	35	0	0	1	1	9.76	12.97	1598.6
徐怡杰	26	1	0	0	0	1	0	0	7	2.5	0	4.5	1	48.3945	2	1	0	0	1	9.37	6.8	2000
许文杰	19	2	0	0	0	0	1	0	3	0	0	3	0	44.7644	45	1	0	0	2	10.09	5.2	2000
薛会层	33	1	0	0	0	0	0	1	6	1	0	5	0	40.589	41	1	1	0	1	9.21	7.64	798.4
薛秋红	33	1	0	0	0	0	1	0	3	0	0	3	0	23.1123	23	1	0	0	1	7.02	12.55	339.6
薛云肖	62	1	0	1	0	0	1	0	3	0	0	3	0	17.8712	18	1	0	0	2	10.71	13.49	306
闫秀梅	51	1	0	0	0	0	1	0	7	1	0	6	1	68.4164	21.8	1	0	0	1	4.3	6.9	268
杨爱香	29	1	0	0	0	1	0	0	7	1	0	6	1	29.9507	1.2	1	1	0	1	8.21	16.72	368.3
杨东梅	76	1	0	0	0	1	0	0	5	1	0	4	0	23.2438	23	1	0	0	2	10.45	8.43	2392
杨冬玲	22	1	0	0	0	1	0	0	5	2	0	3	0	69.5014	70	1	1	0	2	12.01	3.3	733
杨二妮	25	1	0	0	1	0	0	1	3	2	0	1	1	29.3589	6.3	1	0	0	2	33.58	2.42	827.5
杨静	39	1	0	0	1	0	0	1	3	0	0	3	0	14.4658	14	0	0	1	1	6.62	16.8	492.7
杨秋华	43	1	0	0	0	1	0	0	5	1	0	4	1	39.6493	12.9	1	1	0	1	8.89	8.81	389.2
杨雅彬	52	1	0	1	0	0	0	1	6	2.5	0	3.5	1	53.7863	3.2	1	1	0	2	10.58	10.9	2000
姚兰云	44	1	0	0	0	0	1	0	2	0	0	2	0	25.3151	25	1	1	0	1	5.92	12.4	500.6
姚锡娟	26	1	0	0	0	1	0	0	5	1	0	4	0	69.5534	70	1	1	0	2	10.65	4.4	2000
叶金娥	47	1	0	0	0	1	0	0	7	2.5	0	4.5	0	22.2904	22	1	0	0	1	9.86	12.27	1316
于桂花	55	1	0	0	0	1	0	0	5	2	0	3	0	27.2082	27	1	0	0	2	14.42	16.77	591.5
于亚平	33	1	0	0	1	0	0	1	3	1	0	2	0	30.9233	31	1	0	0	2	13.32	15.27	1797.3
张保吉	67	2	0	0	0	0	1	0	3	1	0	2	0	52.589	53	1	1	0	2	10.86	16.3	939
张国朝	47	2	0	0	0	0	0	1	3	0	0	3	0	29.9041	30	1	1	0	2	13.31	14.12	1734.5
张佳佳	24	1	0	0	0	0	1	0	5	5	1	0	1	55.989	46.7	1	1	0	2	10.52	17.55	741.5
张金凤	41	1	0	0	0	1	0	0	5	5	1	0	0	65.8137	66	1	1	0	2	12.11	5.9	233
张雯倩	26	1	0	0	0	1	0	0	2	0	0	2	0	62.4658	62	1	1	0	1	8.32	5.6	996
张志红	46	1	0	0	0	0	1	0	4	2	0	2	1	72.3945	16	0	1	0	1	9.21	6.7	1445
赵爱珍	44	1	0	0	0	0	1	0	4	0	0	4	0	17.3274	17.3	1	0	0	1	8.09	12.56	2000
赵培玲	45	1	0	0	1	0	0	1	6.5	3.5	1	3	0	75.8466	76	1	1	0	1	6.08	14	2000
赵文华	28	2	0	0	0	0	1	0	2	0	0	2	0	60.263	60	1	0	0	2	36.26	20	236
赵云	62	1	0	0	0	0	1	0	2	0	0	2	0	82.6384	83	1	0	0	2	10.6	3.7	2000
钟青德	67	2	0	1	0	1	0	0	5	3.5	1	1.5	0	42.3452	42	1	0	0	2	14.22	8.89	1975
周本杨	25	2	0	0	0	0	1	0	6	1.5	0	4.5	0	41.0959	41	1	0	0	2	10.82	4.74	2000
周惠珍	47	1	0	0	0	1	0	0	3	0	0	3	0	14.4658	14	1	1	0	1	8.57	14.61	508.8
周小增	19	1	0	0	0	1	0	0	3	0	0	3	1	53.4904	35.3	1	1	0	2	10.06	5.7	861
周要宽	44	2	0	0	0	0	0	1	5.5	3.5	0	2	0	71.6712	72	1	0	0	2	17.33	5	2000
周占平	37	2	0	0	0	0	1	0	8	5	1	3	0	38.0055	38	1	0	0	2	11.29	2.97	2000
朱倍可	30	1	0	0	0	1	0	0	7	2.5	0	4.5	0	37.0521	37	1	0	0	1	9.86	7.35	1989.9
朱家喜	26	1	0	0	0	1	0	0	3	1	0	2	0	42.5808	43	1	0	1	2	15.32	10.78	2944.2
朱瑞英	15	1	0	0	0	1	0	0	7	2.5	0	4.5	0	17.8904	18	1	1	0	2	10.75	2.5	1674.1
朱秀斌	61	2	1	0	0	0	1	0	3	1.5	0	1.5	1	48.4932	1.9	1	1	0	2	19.73	4.3	183
朱姚乐	18	1	0	0	0	1	0	0	5	4	1	1	0	32.8301	33	1	1	0	2	17.85	8.67	335.7
朱振鹏	28	2	0	0	0	0	1	0	5	2.5	0	2.5	0	33.2384	33	1	0	0	2	14.33	23.13	2134
壮勤先	61	1	0	0	0	0	1	0	6	3	0	3	1	84.4603	7	1	0	0	2	16.57	2.7	2000
